# Supplementary material
Source: MDPI journal article supplement (https://www.mdpi.com/2312-7481/8/9/99)
Supplement: s1 [file s1]

Archive with 1 entries (1 files):
- magnetochemistry-1866241-supplementary.pdf
