# Supplementary material
Source: MDPI journal article supplement (https://www.mdpi.com/2312-7481/8/9/99)
Supplement: s1 [file s1 › magnetochemistry-1866241-supplementary.pdf]

## Supplementary Material

Research Article

### Automated immunomagnetic enrichment and optomicrofluidic detection to isolate breast cancer cells: A proof-of-concept towards PoC therapeutic decision-making

Janis Stiefel <sup>1,\*</sup>, Michael Baßler <sup>1</sup>, Jörn Wittek <sup>1</sup> and Christian Freese <sup>1</sup>

<sup>1</sup> Fraunhofer Institute for Microengineering and Microsystems IMM, Mainz, Germany

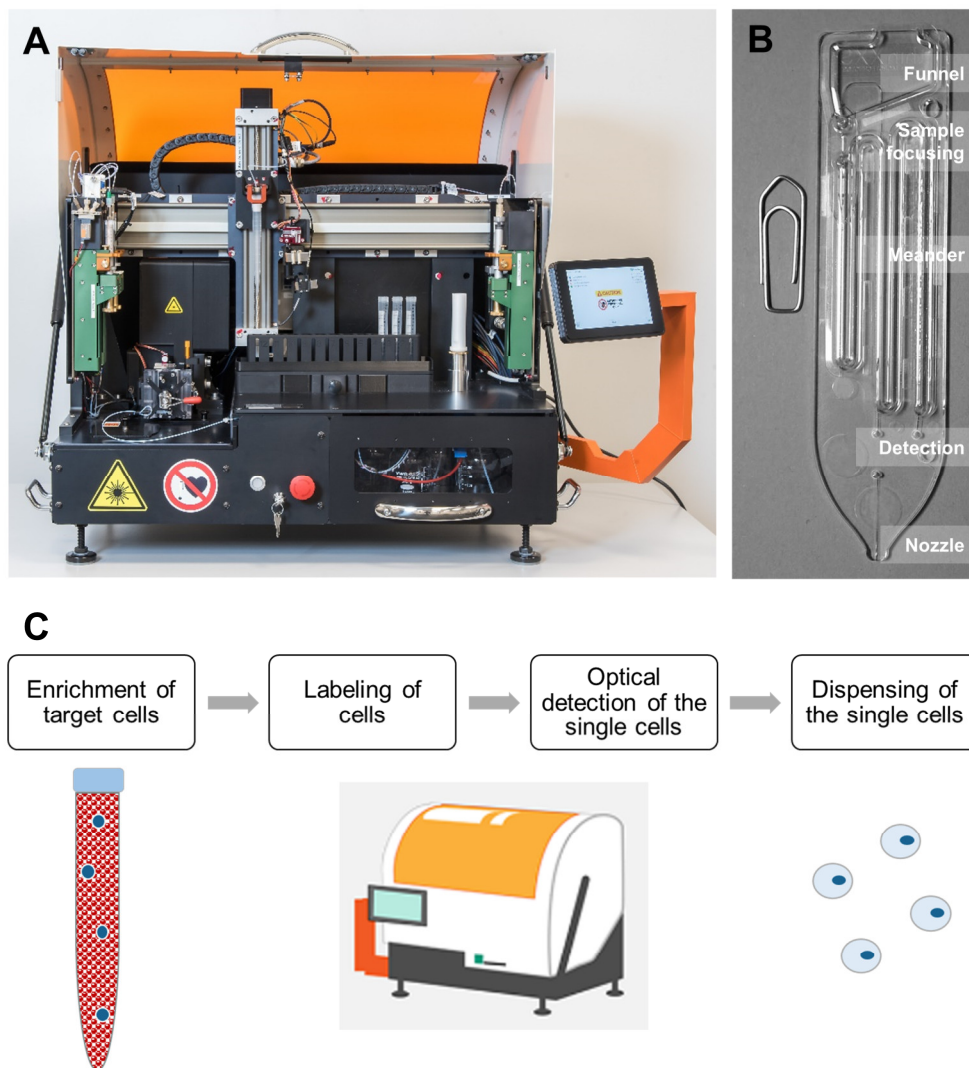

**Figure S1. CTSelect system, microfluidic chip and process conception.** A) The benchtop device consists of an immunomagnetic enrichment module (right-sided) and a microfluidic fluorescence-activated cell sorting (μCS) subunit (left-sided). The fully-automated isolation process is user-controlled via touchscreen. Sample handling and transfer is managed by a pipetting robot. B) The CTSelect chip is placed in the chip holder of the cell sorting subunit and disposed after isolation. The chip consists of a reservoir funnel for the cell suspension, a

hydrodynamic focusing channel, a detection zone and a nozzle for cell dispensing. C) CTSelect concept for single cell dispensing from 7.5 mL samples (from Stiefel et al. *Eng Life Sci.* 2022; 22: 391– 406. <https://doi.org/10.1002/elsc.202100133> [9]).

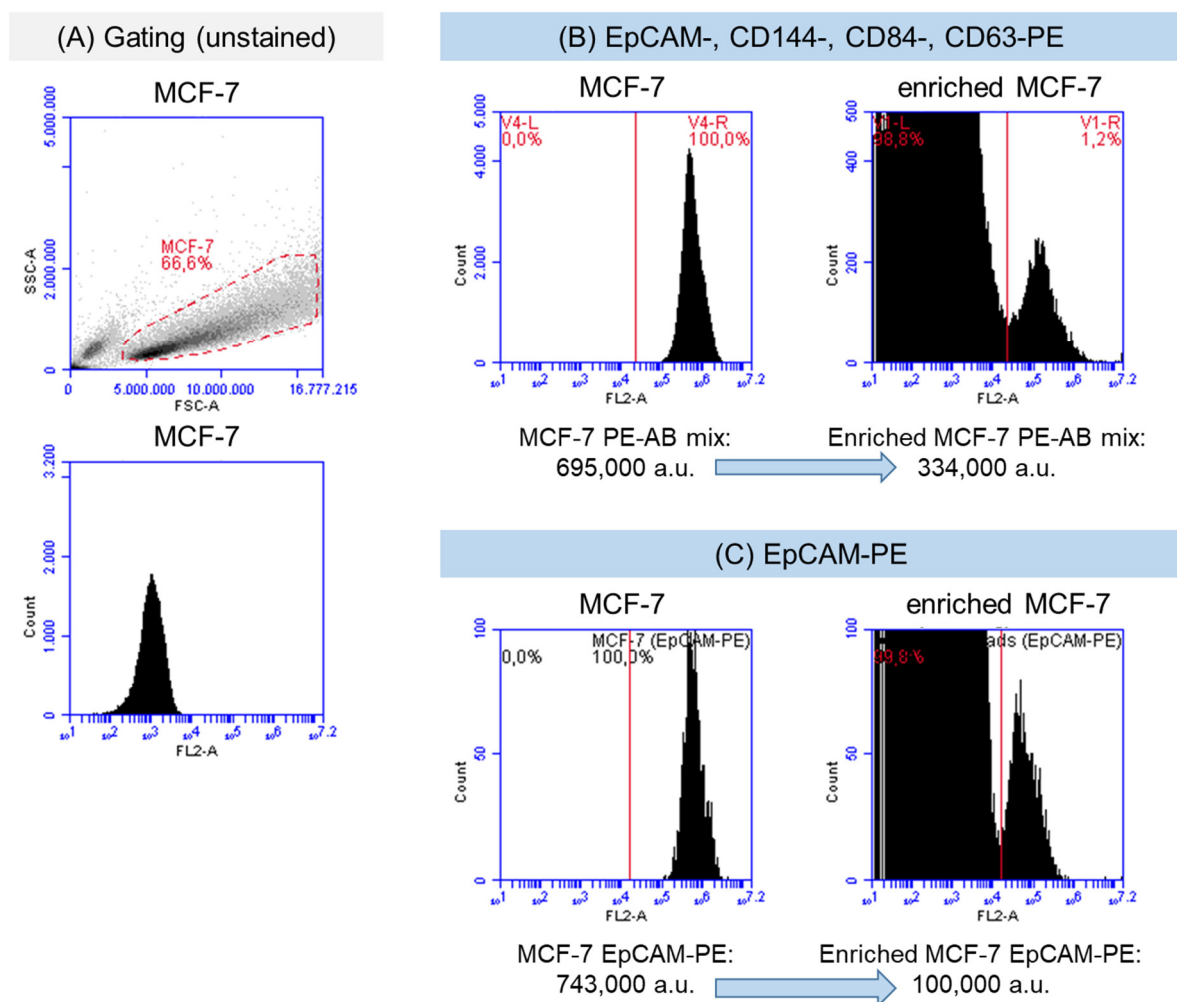

**Figure S2. Flow cytometry of PE-antibody (AB) stained MCF-7 cells with or without beads enrichment.** MCF-7 cells were enriched with EpCAM-coupled immunomagnetic beads for 10 minutes. Unbound and enriched cells were then stained with either EpCAM-, CD144-, CD84-, CD63-PE (B) or only EpCAM-PE (C) antibody solution (1:30) alternated with several washing steps. Fluorescence intensity in the FL2 channel was measured using the flow cytometer. Events of unbound cells were gated to an unstained MCF-7 population from a previous measurement (A). Beads were detected as a large overlapping population at  $FL2 < 10^4$  a.u.

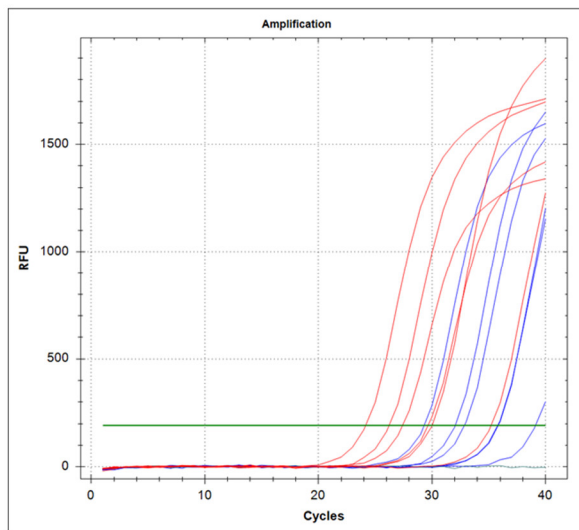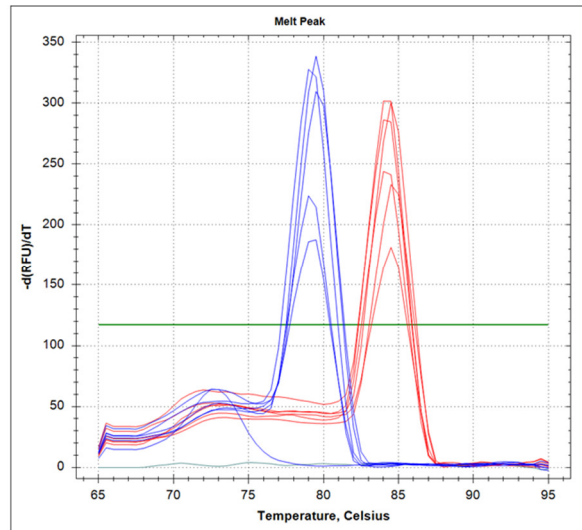

| Target       | Cell count      | C <sub>T</sub> | Mean C <sub>T</sub> |
|--------------|-----------------|----------------|---------------------|
| <b>Actin</b> | 40 cells        | 24,15          | <b>24,15</b>        |
|              | 20 cells        | 26,22          | <b>26,22</b>        |
|              | 1 cell          | 30,02          | <b>32,61</b>        |
|              | 1 cell          | 35,20          |                     |
|              | 1 cell cultured | 29,64          | <b>28,52</b>        |
|              | 1 cell cultured | 27,40          |                     |
| <b>EpCAM</b> | 40 cells        | 29,31          | <b>29,31</b>        |
|              | 20 cells        | 32,05          | <b>32,05</b>        |
|              | 1 cell          | 39,11          | <b>37,47</b>        |
|              | 1 cell          | 35,83          |                     |
|              | 1 cell cultured | 35,78          | <b>34,32</b>        |
|              | 1 cell cultured | 32,85          |                     |

EpCAM (136 bp)  
 B-actin (176 bp)  
 NegC EpCAM (medium)

**Figure S3. qPCR and melt curve analysis from RNA of one, 20 and 40 MCF-7 single cells targeting EpCAM and  $\beta$ -actin.** Two-step qPCR was performed with RNeasy Micro RNA isolation kit (QIAGEN) to confirm fluorescence signals at low cell numbers. Therefore, we picked single cells from a cell suspension in a petri dish and directly lysed one, 20 and 40 cells per spin column. We observed an increase in relative fluorescence intensity in clear correlation with the cell number for both EpCAM and  $\beta$ -actin expression. Seeded single cells (“cultured”) from a 96 well plate served as a control.

**Table T1. Primer Sequences.**

| Name      | Gene (human), mRNA                | Product length [bp] | Sequence (5'-3')           |
|-----------|-----------------------------------|---------------------|----------------------------|
| Aktin_for | β-actin ACTB                      | 176                 | ATT GCC GAC AGG ATG CAG AA |
| Aktin_rev |                                   |                     | GGG CCG GAC TCG TCA TAC TC |
| EpCAM_for | Epithelial cell adhesion molecule | 136                 | CCG CAG CTC AGG AAG AAT GT |
| EpCAM_rev |                                   |                     | CAT TTG GCA GCC AGC TTT GA |
| PGR_for   | Progesterone transcr. V1          | 194                 | GTCTACCCGCCCTATCTCAAC      |
| PGR_rev   |                                   |                     | TAGTTGTGCTGCCCTTCCATT      |
| ESR1_for  | Estrogen transcr. V1              | 129                 | TGGGAATGATGAAAGGTGGGA      |
| ESR1_rev  |                                   |                     | GGTTGGCAGCTCTCATGTCT       |
| HER2_for  | HER-2/NEU (ERBB2) transcr. V1     | 108                 | CCGGAGCCGCAGTGAG           |
| HER2_rev  |                                   |                     | CTGTGCCGGTGCACACTT         |
| CD45_for  | CD45; PTPRC transcr. V1           | 159                 | ACCAGGAATGGATGTCGCTA       |
| CD45_rev  |                                   |                     | TGGGGCCTGTAAAAGTGTCC       |
| CXCR4_for | C-X-C motif chemokine receptor 4  | 60                  | CTGTGAGCAGAGGGTCCAG        |
| CXCR4_rev |                                   |                     | ATGAATGTCCACCTCGCTT        |
